# THE AMERICAN JOURNAL OF PSYCHIATRY

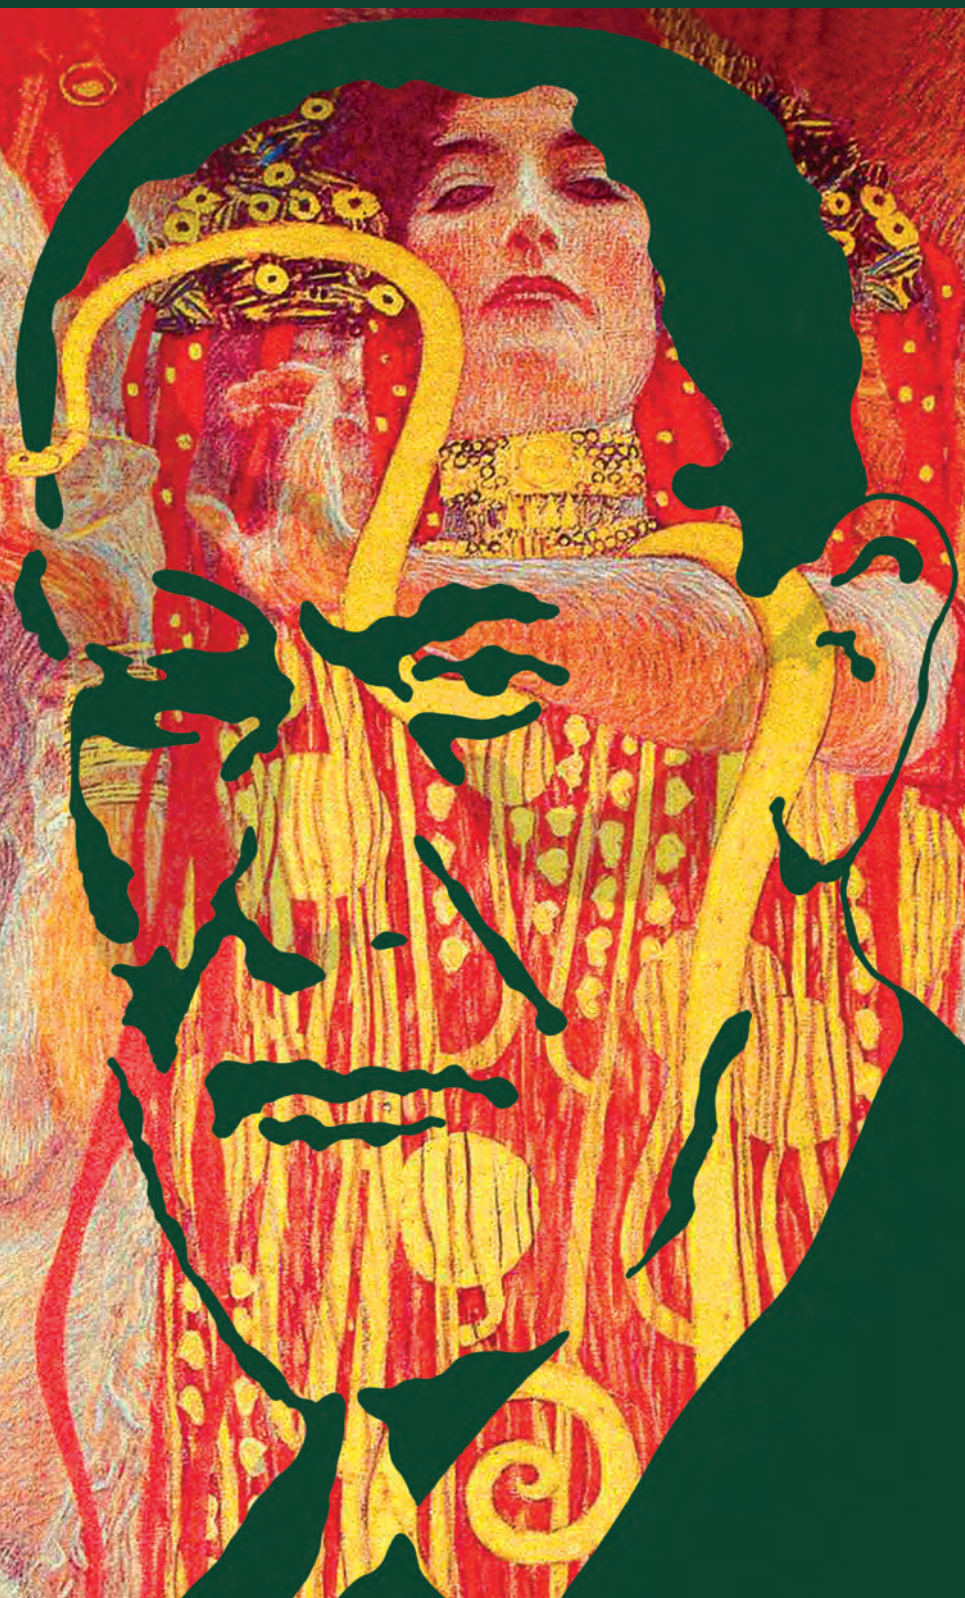

◀ Gustav Klimt, Egon Schiele, and  
Fin de Siècle Vienna

Peter J. Buckley, M.D.

692

Risk Adjustment in Health  
Insurance Exchanges for  
Individuals with Mental Illness

Colleen L. Barry, Ph.D., M.P.P., et al.

704

Interplay of Genetic Risk Factors  
(*CHRNA5-CHRNA3-CHRN4*) and  
Cessation Treatments in Smoking  
Cessation Success

Li-Shiun Chen, M.D., M.P.H.,  
Sc.D., et al.

735

◀ Review of Eric Kandel's "*The  
Age of Insight: The Quest to  
Understand the Unconscious  
in Art, Mind, and Brain*"

Peter F. Buckley, M.D.

764

Continuing Medical Education

767

July 2012

Volume 169 • Number 7

Official Journal of the  
AMERICAN PSYCHIATRIC ASSOCIATION

[ajp.psychiatryonline.org](http://ajp.psychiatryonline.org)
