# THE AMERICAN JOURNAL OF PSYCHIATRY

## EDITOR-IN-CHIEF

Robert Freedman, M.D.

## DEPUTY EDITORS

David A. Lewis, M.D.

Robert Michels, M.D.

Daniel S. Pine, M.D.

Susan K. Schultz, M.D.

Carol A. Tamminga, M.D.

## EDITORIAL STAFF

**Executive Editor**  
Michael D. Roy

**Senior Editor/Features Writer**  
Jane Weaver, E.L.S.

**Senior Editor**  
John J. Guardiano, Ph.D.

**Production Manager**  
Susan Westrate

**Assistant Editors**  
Katie Duffy  
Angela Moore

**Editorial Support Services  
Manager**  
Nicole Gray

**Editorial Assistant**  
Linda LaCour

**Editorial Assistant/  
Permissions Coordinator**  
Heidi Koch

**Assistants to the Editors**  
Lois Lilienthal  
Laura English  
Rachel Hogg  
Russell A. Scholl

## ASSOCIATE EDITORS

Kathleen T. Brady, M.D., Ph.D.

David A. Brent, M.D.

Linda Brzustowicz, M.D.

Cameron S. Carter, M.D.

Steven Hamilton, M.D., Ph.D.

Daniel C. Javitt, M.D.

Bankole Johnson, M.D.

Ellen Leibenluft, M.D.

Douglas F. Levinson, M.D.

Jeffrey A. Lieberman, M.D.

Barbara Milrod, M.D.

Maria A. Oquendo, M.D.

Jerrold F. Rosenbaum, M.D.

A. John Rush, M.D.

Larry J. Siever, M.D.

Patricia Suppes, M.D., Ph.D.

## EDITOR EMERITA

Nancy C. Andreasen, M.D., Ph.D.

## FORMER EDITORS

Amariah Brigham, M.D.  
1844-1849

T. Romeyn Beck, M.D.  
1849-1854

John P. Gray, M.D.  
1854-1886

G. Alder Blumer, M.D.  
1886-1894

Richard Dewey, M.D.  
1894-1897

Henry M. Hurd, M.D.  
1897-1904

Edward N. Brush, M.D.  
1904-1931

Clarence B. Farrar, M.D.  
1931-1965

Francis J. Braceland, M.D.  
1965-1978

John C. Nemiah, M.D.  
1978-1993

The American Journal of Psychiatry is online at [ajp.psychiatryonline.org](http://ajp.psychiatryonline.org)

# THE AMERICAN PSYCHIATRIC ASSOCIATION

1000 Wilson Blvd., Suite 1825, Arlington, VA 22209-3901  
(888) 357-7924 (toll-free inside the U.S. and Canada) / (703) 907-7300  
web site: [www.psych.org/](http://www.psych.org/) e-mail: [apa@psych.org](mailto:apa@psych.org)

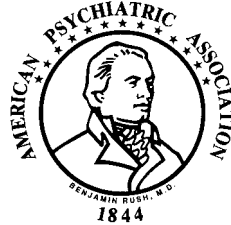

## OFFICERS 2012–2013

|                 |                            |
|-----------------|----------------------------|
| President       | Dilip V. Jeste, M.D.       |
| President-Elect | Jeffrey A. Lieberman, M.D. |
| Treasurer       | David Fassler, M.D.        |
| Secretary       | Roger Peele, M.D.          |

## ASSEMBLY

|               |                        |
|---------------|------------------------|
| Speaker       | R. Scott Benson, M.D.  |
| Speaker-Elect | Melinda L. Young, M.D. |
| Recorder      | Jenny L. Boyer, M.D.   |

## MEDICAL DIRECTOR'S OFFICE

|                          |                            |
|--------------------------|----------------------------|
| Medical Director and CEO | James H. Scully, Jr., M.D. |
|--------------------------|----------------------------|

## BOARD OF TRUSTEES

|                          |                            |
|--------------------------|----------------------------|
| Jeffrey Akaka, M.D.      | Judith F. Kashtan, M.D.    |
| Carol A. Bernstein, M.D. | Molly K. McVoy, M.D.       |
| Brian Crowley, M.D.      | James E. Ninger, M.D.      |
| Jeffrey Geller, M.D.     | John M. Oldham, M.D.       |
| Marc David Graff, M.D.   | Alan F. Schatzberg, M.D.   |
| James A. Greene, M.D.    | Alik S. Widge, M.D., Ph.D. |

## PUBLISHER

Rebecca D. Rinehart

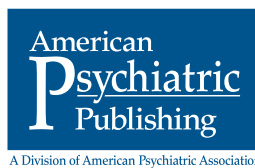

The American Journal of Psychiatry is online at [ajp.psychiatryonline.org](http://ajp.psychiatryonline.org)

THE AMERICAN PSYCHIATRIC ASSOCIATION  
Chairpersons of Councils, Commissions, Committees, and Task Forces

Standing Committees

**Bylaws**

Eric M. Plakun, M.D.

**Elections**

Robert E. Kelly, Jr., M.D.

**Ethics**

Richard D. Milone, M.D.

**Finance and Budget**

Frank W. Brown, M.D.

*Audit*

David Fassler, M.D.

*Investment Oversight*

Larry R. Faulkner, M.D.

**Joint Reference**

Jeffrey A. Lieberman, M.D.

**Membership**

Joseph Ezra V. Rubin, M.D.

**Nominating**

John M. Oldham, M.D.

**Tellers**

Tanya Nayyirah Alim, M.D.

**Council on Addiction Psychiatry**

John A. Renner, M.D.

**Council on Advocacy and Government Relations**

Robert Paul Cabaj, M.D.

*Advocacy and Litigation Funding*

Renee L. Binder, M.D.

**Council on Children, Adolescents, and Their Families**

Louis J. Kraus, M.D.

*Agnes Purcell McGavin Award*

*Blanche F. Ittleson Research Award*

Karen Dineen Wagner, M.D.

**Council on Communications**

Jeffrey A. Borenstein, M.D.

**Council on Geriatric Psychiatry**

Brent P. Forester, M.D.

**Council on Healthcare Systems and Financing**

Sul Ross Olen Thorward, M.D.

*Reimbursement for Psychiatric Care*

Bruce J. Schwartz, M.D.

*RBRVS, Codes and Reimbursement*

Ronald M. Burd, M.D.

**Council on Medical Education and Lifelong Learning**

Sandra Sexson, M.D.

*APA Public Psychiatry Fellowship Selection Committee*

Stephen M. Goldfinger, M.D.

*APA/SAMHSA Minority Fellowship Selection and Advisory*

Toi B. Harris, M.D.

*Scientific Program*

Joseph A. Cheong, M.D.

*Scientific Program Committee of the Institute on Psychiatric Services*

David Alan Pollack, M.D.

*Task Force to Update the Ethics Annotations*

Laura W. Roberts, M.D.

*Vestermark Award Committee*

Frederick G. Guggenheim, M.D.

**Council on Minority Health and Health Disparities**

Sandra C. Walker, M.D.

**Council on Psychiatry And Law**

Patricia R. Recupero, M.D., J.D.

*Isaac Ray/Human Rights Award*

Steven K. Hoge, M.D.

*Judicial Action*

Paul S. Appelbaum, M.D.

*Manfred S. Guttmacher Award*

Rebecca W. Brendel, M.D., J.D.

**Council on Psychosomatic Medicine  
(Consultation Liaison Psychiatry)**

Joel E. Dimsdale, M.D.

**Council on Research and Quality Care**

Joel Yager, M.D.

*Electronic Health Records*

Steven Roy Daviss, M.D.

*Psychiatric Dimensions of Disasters*

Robert J. Ursano, M.D.

*Research Awards*

Lewis L. Judd, M.D.

*Steering Committee on Practice Guidelines*

Joel Yager, M.D.

*Task Force on DSM-V*

David J. Kupfer, M.D.

*Task Force to Revise the Practice of Electroconvulsive Therapy*

Sarah H. Lisanby, M.D.

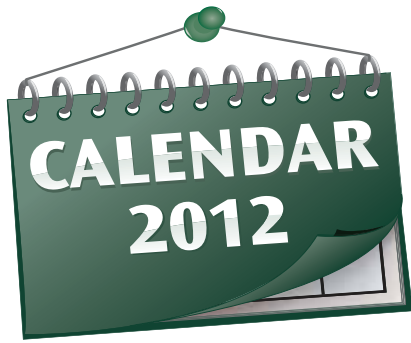

*For free listing of your organization's official annual or regional meeting, please send us the following information: sponsor, location, inclusive dates, type and number of continuing education credits (if available), and the name, address, and telephone number of the person or group to contact for more information. In order for an event to appear in our listing, all notices and changes must be received at least 6 months in advance of the meeting and should be addressed to:*

*Calendar, American Journal of Psychiatry, 1000 Wilson Boulevard, Suite 1825, Arlington, VA 22209-3901, [swestate@psych.org](mailto:swestate@psych.org) (e-mail).*

*Because of space limitations, only listings of meetings of the greatest interest to Journal readers may be included.*

---

## SEPTEMBER

**September 21–23**, 5th International Conference on Schizophrenia (ICONS V), Chennai, India. Organised by the Schizophrenia Research Foundation (India) in collaboration with Schizophrenia International Research Society. Co-sponsored by WPA, Indian Psychiatric Society. For details see [www.icons-scarf.org](http://www.icons-scarf.org).

**September 27–29**, 2nd International Congress on Borderline Personality Disorder and Allied Disorders, Amsterdam RAI Convention Center, The Netherlands. Contact Theo Ingenhoven, [Scientificcommittee@esspd.eu](mailto:Scientificcommittee@esspd.eu) (email); or [borderline2012@cpo-hanser.de](mailto:borderline2012@cpo-hanser.de) (email); <http://www.borderline-congress.org> (web site).

---

## OCTOBER

**October 3–5**, International Biennial Congress of the Marcé Society (International Society for the Understanding, Prevention and Treatment of Mental Illness Related to Childbearing), in collaboration with the Société Marcé Francophone, Paris, France (conducted

in English). Contact: Ms. Nicole Greer, 5034-A Thoroughbred Lane, Brentwood, TN 37027 USA; (615) 324-2362 (tel); [info@marcesociety.com](mailto:info@marcesociety.com) (email); [www.marcesociety.com](http://www.marcesociety.com) (web site).

**October 3–7**, Joint Meeting of the Southern Psychiatric Association; Maryland Psychiatric Society; and West Virginia Psychiatric Society, White Sulphur Springs, West Virginia (The Greenbrier). Contact Susan Proctor, (410) 938-3403; [www.sopsych.org](http://www.sopsych.org) (web site).

**October 4–7**, 64th Institute on Psychiatric Services, American Psychiatric Association, New York, NY. Contact: Jill Gruber, APA Annual Meetings Dept., 1000 Wilson Blvd., Ste. 1825, Arlington, VA 22209; (703) 907-7815.

---

## DECEMBER

**December 6–9**, 23rd Annual Meeting and Symposium, American Academy of Addiction Psychiatry, Turnberry Isle Hotel Miami, Aventura, Florida. Contact: Isabel Vieira, 400 Massasoit Ave, Suite 307 (2nd floor), East Providence, RI 02914; (401) 524-3076 (tel); [www.aaap.org/meetings-and-events](http://www.aaap.org/meetings-and-events) (web site).

---

## JUNE 2013

**June 6–9**, 4th World Congress on ADHD: From Childhood to Adult Disease, Milan, Italy. Contact Congress Organizer, +49-40-670 88 20 (tel); [adhd2013@cpo-hanser.de](mailto:adhd2013@cpo-hanser.de) (email); [www.adhd-congress.org](http://www.adhd-congress.org) (web site).

---

## JULY 2014

**July 8–13**, 28th International Congress of Applied Psychology, Palais des Congrès de Paris, France. Contact [exh@icap2014.com](mailto:exh@icap2014.com) (email); [www.icap2014.com](http://www.icap2014.com) (web site).

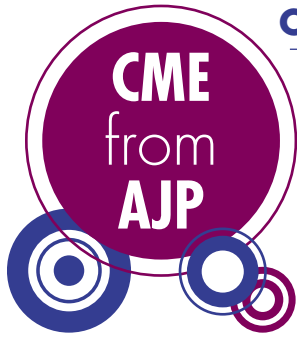

## Continuing Medical Education

Three articles in this issue form the basis of a short course with questions that can be answered for up to 1 *AMA PRA Category 1 Credit™* each by visiting <http://psychiatryonline.org/cme.aspx> and clicking on the “American Journal of Psychiatry” tab.

CME credit is issued only online, and a paid subscription to the AJP CME course program is required.

This month's courses appear on pages 767–770.

FREE AUDIO!

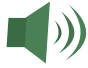

## Have You Heard?

You can listen to highlights of *The American Journal of Psychiatry* by downloading a monthly free .mp3 audio file from our web site (<http://ajp.psychiatryonline.org/audio.aspx#>) or by subscribing to the AJP Audio podcast at iTunes or other feed reader. Presented by Deputy Editor Dr. Susan Schultz or by Executive Editor Michael Roy, each month's audio lasts approximately 30 minutes and covers several research articles, the Treatment in Psychiatry feature, and one or two editorials.

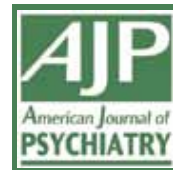

Coming in the August 2012 issue\*

## THE AMERICAN JOURNAL OF PSYCHIATRY

### A Double-Blind Randomized Controlled Trial of *N*-Acetylcysteine in Cannabis-Dependent Adolescents

K.M. Gray, M. J. Carpenter, N.L. Baker, S.M. DeSantis, E. Kryway, K.J. Hartwell, A.L. McRae-Clark, and K.T. Brady

### Metformin for Treatment of Antipsychotic-Induced Amenorrhea and Weight Gain in Women With First-Episode Schizophrenia: A Double-Blind, Randomized, Placebo-Controlled Study

R.-R. Wu, H. Jin, K. Gao, E.W. Twamley, J.-J. Ou, P. Shao, J. Wang, X.-F. Guo, J.M. Davis, P.K. Chan, and J.-P. Zhao

### Regional fMRI Hypoactivation and Altered Functional Connectivity During Emotion Processing in Nonmedicated Depressed Patients With Bipolar II Disorder

N. Vizueta, J.D. Rudie, J.D. Townsend, S. Torrisi, T.D. Moody, S.Y. Bookheimer, and L.L. Altshuler

### Deep Brain Stimulation of Anteromedial Globus Pallidus Interna for Severe Tourette's Syndrome

E. Cannon, P. Silburn, T. Coyne, K. O'Malley, J.D. Crawford, and P.S. Sachdev

\*Can't wait? Visit [ajp.psychiatryonline.org/AJPInAdvance.aspx](http://ajp.psychiatryonline.org/AJPInAdvance.aspx) to see all articles uploaded in advance of print!

## Contents

- A1 Editorial Board  
A3 Highlights of this issue

## Editorials

- 1 **Neuroimaging in psychiatry: bringing neuroscience into clinical practice**  
M. L. Phillips
- 4 **Psychotic symptoms in young people without psychotic illness: mechanisms and meaning**  
G. K. Murray and P. B. Jones

- 6 **On Magritte's *Healer* – poem**  
Kate Evans

- 7 **Research and the elimination of the stigma of mental illness**  
P. W. Corrigan

## Reappraisal

- 9 **Grief as a psychiatric disorder**  
R. A. Bryant

## Review article

- 11 **Impact of ethnic density on adult mental disorders: narrative review**  
R. J. Shaw, K. Atkin, L. Bécares, C. B. Albor, M. Stafford, K. E. Kiernan, J. Y. Nazroo, R. G. Wilkinson and K. E. Pickett

- 19 **Bulimia – in 100 words**  
Janet Treasure, Gerald Russell

- 19 **Bulimia nervosa – in 100 words**  
Gerald Russell, Janet Treasure

## Papers

- 20 **Childhood attention problems and socioeconomic status in adulthood: 18-year follow-up**  
C. Galéra, M.-P. Bouvard, E. Lagarde, G. Michel, E. Touchette, E. Fombonne and M. Melchior

- 25 **The Adjudicator of Pain – poems by doctors**  
Ron Charach

- 26 **Clinicopathological significance of psychotic experiences in non-psychotic young people: evidence from four population-based studies**  
I. Kelleher, H. Keeley, P. Corcoran, F. Lynch, C. Fitzpatrick, N. Devlin, C. Molloy, S. Roddy, M. C. Clarke, M. Harley, L. Arseneault, C. Wesserman, V. Carl, M. Sarchiapone, C. Hoven, D. Wesserman and M. Cannon

- 33 **White matter abnormalities and illness severity in major depressive disorder**  
J. Cole, C. A. Chaddock, A. E. Farmer, K. J. Althison, A. Simmons, P. McGuffin and C. H. Y. Fu

- 40 **Relationship between progression of brain white matter changes and late-life depression: 3-year results from the LADIS study**  
M. J. Firbank, A. Teodorczuk, W. M. van der Flier, A. A. Gow, A. Wallin, T. Erkinjuntti, D. Inzitari, L.-O. Wahlund, L. Pantoni, A. Poggesi, G. Pracucci, P. Langhorne and J. T. O'Brien on behalf of the LADIS group

- 46 **Magnetic resonance imaging in late-life depression: vascular and glucocorticoid cascade hypotheses**  
C. E. Sexton, M. Le Masurier, C. L. Allan, M. Jenkinson, L. McDermott, U. G. Kalu, L. L. Herrmann, K. M. Bradley, C. E. Mackay and K. P. Ebmeier

- 52 **Comparison of neuroleptic malignant syndrome induced by first- and second-generation antipsychotics**  
J. N. Trollor, X. Chen, K. Chitty and P. S. Sachdev

- 57 **Filmed v. live social contact interventions to reduce stigma: randomised controlled trial**  
S. Clement, A. van Nieuwenhuizen, A. Kassam, C. Flach, A. Lazarus, M. de Castro, P. McCrone, I. Norman and G. Thornicroft

- 64 **Mayer-Gross, Slater and Roth's *Clinical Psychiatry* – reflection**  
Alan Lee

- 65 **Psychometric properties of the Mental Health Recovery Star**  
H. Killaspy, S. White, T. L. Taylor and M. King

## Short report

- 71 **Effects of emotion perception training on mood in undergraduate students: randomised controlled trial**  
I. S. Penton-Voak, H. Bate, G. Lewis and M. R. Munafó

## Columns

- 73 **Correspondence**  
77 **Corrections**  
78 **Book reviews**  
80 **Contents of *Advances in Psychiatric Treatment***  
81 **Contents of the *American Journal of Psychiatry***  
82 **From the Editor's desk**

## Cover picture

Kim Noble (b. 1960) has gained international acclaim for both the originality of her work and the remarkable story of her life. From the age of 14 Kim spent over 20 years in and out of hospital until she was diagnosed with dissociative identity disorder. DID posits the existence of many identities within one person as 'alters'. Thirteen of Kim's alters paint, each with their own distinctive style, colours and themes, ranging from layered abstracts to challenging figurative works.

*Longing Rose* (2007) by Judy: This is a painting in a figurative series of three using the same name, Rose (both literal and symbolic), *Rose*, *Longing Rose* and *Crying Rose*. They show a sequence of a young woman's growing sexual and emotional awakening which leads to betrayal and loss. The state of the actual physical flower, the rose, tells what is happening to the woman of the same name. There is a sculptural impact in the thickness of the painted rose. This was painted in acrylic on canvas with a palette knife, size 91cm x 122cm.

We are always looking for interesting and visually appealing images for the cover of the *Journal* and would welcome suggestions or pictures, which should be sent to Dr Allan Beveridge, British Journal of Psychiatry, 17 Belgrave Square, London SW1X 8PG, UK or [bjp@rcpsych.ac.uk](mailto:bjp@rcpsych.ac.uk).

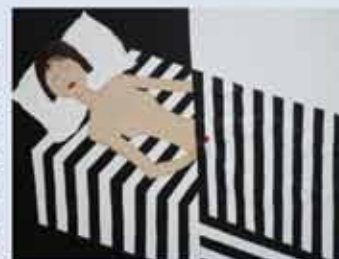

Source: https://psychiatryonline.org/doi/suppl/10.1176/ajp.2012.169.issue-7/suppl_file/front.pdf
