# THE AMERICAN JOURNAL OF PSYCHIATRY

## En este número

A30

### Perspectivas

#### Editoriales

- 675 Reforma sanitaria, seguro médico y atención en salud mental**  
Rachel L. Garfield y Benjamin G. Druss [Audio](#)
- 678 Marcando la diferencia**  
Anthony F. Lehman
- 681 El potencial emergente de la farmacogenética en psiquiatría**  
Francis E. Lotrich
- 684 Adelgazamiento cortical y conectividad funcional en la psicopatía**  
R. J.R. Blair

#### Conferencia de Caso Clínico

- 688 Uso de una terapia integrada con exposición prolongada para tratar el trastorno por estrés postraumático y la dependencia concomitante del alcohol en un veterano de Iraq**  
Sudie E. Back, Therese Killeen, Edna B. Foa, Elizabeth J. Santa Ana, Daniel F. Gros, y Kathleen T. Brady [Audio](#) [Guías clínicas](#)

#### Imágenes en Psiquiatría

- 692 Gustav Klimt, Egon Schiele y la Viena Fin de Siècle**  
Peter J. Buckley

#### Revisión y Resumen

- 693 Neuroimágenes funcionales del trastorno depresivo mayor: meta-análisis y una nueva integración de datos de activación basal y respuesta neuronal**  
J. Paul Hamilton, Amit Etkin, Daniella J. Furman, Maria G. Lemus, Rebecca F. Johnson, y Ian H. Gotlib

## Nuevas investigaciones

### Artículos

- 704 Ajuste de riesgo en intercambios de seguros médicos para personas con enfermedad mental**  
Colleen L. Barry, Jonathan P. Weiner, Klaus Lemke, y Susan H. Busch [Audio](#) [Editorial](#)
- 710 Combinación de remediación cognitiva y entrenamiento en aptitudes funcionales para la esquizofrenia: efectos en la cognición, la competencia funcional y el comportamiento en el mundo real**  
Christopher R. Bowie, Susan R. McGurk, Brent Mausbach, Thomas L. Patterson, y Philip D. Harvey [Audio](#) [Guías clínicas](#) [Editorial](#) [EMC](#)
- 719 Análisis de la estimulación transcraneal por corriente directa (ETCD) como tratamiento para las alucinaciones en la esquizofrenia**  
Jerome Brunelin, Marine Mondino, Leila Gassab, Frederic Haesebaert, Lofti Gaha, Marie-Françoise Suaud-Chagny, Mohamed Saoud, Anwar Mechri, y Emmanuel Poulet [Audio](#)
- 725 La variación genética en *KCNH2* asociada con la expresión en el cerebro de un isomorfo único de hERG modula la respuesta al tratamiento en pacientes con esquizofrenia**  
José A. Apud, Fengyu Zhang, Heather Decot, Kristin L. Bigos, y Daniel R. Weinberger [Editorial](#) [EMC](#)
- 735 Interacción de los factores de riesgo genéticos (*CHRNA5-CHRNA3-CHRN4*) y los tratamientos de deshabituación para lograr dejar de fumar**  
Li-Shiun Chen, Timothy B. Baker, Megan E. Piper, Naomi Breslau, Dale S. Cannon, Kimberly F. Doheny, Stephanie M. Gogarten, Eric O. Johnson, Nancy L. Saccone, Jen C. Wang, Robert B. Weiss, Alison M. Goate, y Laura Jean Bierut [Audio](#) [Guías clínicas](#) [Editorial](#) [EMC](#)
- 743 Adelgazamiento cortical en la psicopatía**  
Martina Ly, Julian C. Motzkin, Carissa L. Philippi, Gregory R. Kirk, Joseph P. Newman, Kent A. Kiehl, y Michael Koenigs [Editorial](#)

- 750 **Respuesta reducida de la amígdala en jóvenes con trastornos de la conducta disruptiva y rasgos psicopáticos: menor respuesta emocional versus mayor atención activa (top down) a rasgos no emocionales**

Stuart F. White, Abigail A. Marsh, Katherine A. Fowler, Julia C. Schechter, Christopher Adalio, Kayla Pope, Stephen Sinclair, Daniel S. Pine, y R. James R. Blair

## Comunicados y actualizaciones

### Cartas al Editor

- 759 La muerte de Sabina Spielrein  
Alivio del tartamudeo del desarrollo por medio de la estimulación cerebral profunda del núcleo ventral intermedio del tálamo  
Bloqueo del ganglio estrellado para el trastorno por estrés postraumático

### Reseñas Bibliográficas

- 761 Retrato del psiquiatra adolescente: los primeros textos y trabajos de R.D. Laing, 1972-1960  
Manual de psicoanálisis, 2a Edición  
Manual de terapia psicodinámica focalizada en el pánico: alcance extendido  
La era de la introspección (insight): la búsqueda para entender el inconsciente en el arte, la mente y el cerebro, desde la Viena de 1900 hasta el presente.

### Other Items of Interest

- 767 **Educación médica Continuada**  
A12 **Directivos de la American Psychiatric Association**

A14 **Calendario**

A25 **British Journal of Psychiatry Contenidos**

### Cubierta

En este número se presenta la reseña de un libro de Eric Kandel sobre la sociedad vienesa y una imagen en psiquiatría sobre Gustav Klimt. Klimt, formado como pintor arquitectónico, contribuyó a la decoración de numerosos edificios públicos en Viena. Los tres cuadros Medicina, Filosofía y Jurisprudencia, se encontraban en tres facultades centrales de la Universidad de Viena en los años 1900–07. Hygieia es un detalle de “Medicina” y en las mitologías griega y romana era la hija del dios de la medicina, Asclepio. Era la personificación de la salud, la limpieza y la sanidad. Desafortunadamente, estos cuadros fueron destruidos por las fuerzas en retirada de las SS en mayo de 1945. Diseño de la cubierta de Tammy Cordova.

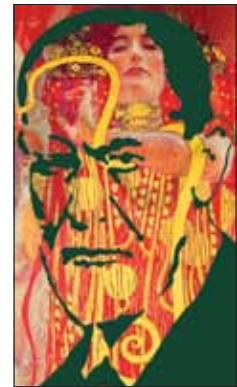

#### Audio

artículo en *AJP Audio*: archivo .mp3 descargable de [ajp.psychiatryonline.org](http://ajp.psychiatryonline.org)

#### Guías clínicas

este artículo ofrece guías clínicas (ver página “En este Número” o al final del artículo)

#### EMC

existe un curso en línea que cubre los contenidos de este artículo para los suscriptores del programa de cursos de EMC del AJP

#### Editorial

este artículo se discute en uno de los editoriales de este número

Presented in collaboration with the Office of Global Health,  
UMDNJ-Robert Wood Johnson Medical School

Translation courtesy of

Sergi Casals, M.S.

Garuna Editors, Barcelona, Spain

Carlos Lopez Jaramillo, M.D.

Universidad de Antioquia, Medellin, Colombia

and

Javier I. Escobar, M.D., M.Sc.

UMDNJ-Robert Wood Johnson Medical School

Consulte *The American Journal of Psychiatry* en línea en  
[ajp.psychiatryonline.org](http://ajp.psychiatryonline.org)

Consulte *The American Journal of Psychiatry* en línea en [ajp.psychiatryonline.org](http://ajp.psychiatryonline.org)
